1 **Rapid, specific detection and quantification of *Yersinia pestis***  
2 **using a species-specific SNP in the ferric uptake regulator**  
3 **gene (*furMAMA*)**

4

5 Authors: Pernille Nilsson,<sup>a#</sup> Shair Gurbanov<sup>b</sup> and W. Ryan Easterday<sup>a#</sup>

6

7 Affiliations:

8 <sup>a</sup> Centre for Ecological and Evolutionary Synthesis, Department of  
9 Biosciences, University of Oslo, P.O. Box 1066 Blindern, NO-0316 Oslo,  
10 Norway

11 <sup>b</sup> Republican Anti-plague station, Baku, Azerbaijan

12 Email addresses:

13 Pernille Nilsson: [pernille.nilsson@ibv.uio.no](mailto:pernille.nilsson@ibv.uio.no)

14 Shair Gurbanov: [shair-gurbanov@mail.ru](mailto:shair-gurbanov@mail.ru)

15 W. Ryan Easterday: [w.r.easterday@ibv.uio.no](mailto:w.r.easterday@ibv.uio.no)

16

17 Running head: Specific quantification of *Y. pestis* with TaqMAMA qPCR

18

19 Corresponding authors:

20 #Address correspondence to Pernille Nilsson, [pernille.nilsson@ibv.uio.no](mailto:pernille.nilsson@ibv.uio.no) or

21 W. Ryan Easterday, [w.r.easterday@ibv.uio.no](mailto:w.r.easterday@ibv.uio.no)

22

23

24

25

## 26 **Abstract**

27 *Yersinia pestis*, the causative agent of plague, is responsible for about 700  
28 human cases of bubonic and pneumonic plague each year. Yet the disease is  
29 far more prevalent within rodent reservoirs than in humans. One of the main  
30 means of outbreak prevention is extensive wildlife surveillance, where  
31 accurate and rapid detection is essential to prevent spillover into the human  
32 population from which, it may otherwise spread more rapidly and over larger  
33 distances. Moreover, detection and quantification of the agent aids in  
34 investigative studies to understand aspects of the pathogen such as  
35 transmission mechanics, pathology, contamination risk and more. Partially  
36 based on a previously developed assay by Gabitzsch et al. 2008 we designed  
37 a TaqMan® mismatch amplification mutation assay (TaqMAMA) where a  
38 primer leverages a species-specific SNP in the chromosomal single copy  
39 ferric uptake regulator gene of *Yersinia pestis*. The assay allows for specific,  
40 rapid detection and quantification of *Yersinia pestis* using only a single  
41 species-specific marker in a highly conserved virulence gene. This low-cost  
42 and simple modification of an existing assay eliminates the need for running  
43 multiple molecular markers for pathogen detection or performing time-  
44 consuming culturing and counting of colonies for quantification.

45

## 46 **Keywords**

47 *Yersinia pestis*, TaqMAMA, quantification, qPCR, pathogen surveillance, SNP  
48 based detection, private allele, bacterial detection.

49

## 50 **Background**

51 The causative agent of plague, *Yersinia pestis*, reached infamy after causing  
52 three devastating human pandemics during recorded history. The disease  
53 however, is mainly a vector-borne, wildlife disease, circulating within rodent  
54 populations across the world, which occasionally spills over into human  
55 populations. Today there are approximately 700 reported human cases of  
56 plague worldwide each year with more than 100 deaths (World Health  
57 Organization, 2017), most of which occur in Africa. Due to the pandemic  
58 history of the pathogen and the continued potential for human outbreaks,  
59 close surveillance of its presence in wildlife systems has been incorporated  
60 into several local and national surveillance programs, some dating back to the  
61 beginning of the 1900s (Melikishvili, 2006).

62

63 Plating of infected animal tissues or fleas and subsequent counting of  
64 bacterial colonies is a well-established, sensitive and widely used method in  
65 many surveillance programs and in diagnostics (Bevins et al., 2012). This is a  
66 time-consuming method that exposes the workers to infectious material for  
67 extended time. The culturing of *Y. pestis* has historically had challenges due  
68 to the relatively slow growth of *Yersinia spp.* compared to the near  
69 omnipresent contaminating microbes on traditional media (Dennis et al., 1999;  
70 Gupta et al., 2015; Sarovich et al., 2010). To overcome some of these issues,  
71 new and improved growth media with increased selectivity for *Y. pestis* have  
72 been developed but still struggle with obstacles such as reduced recovery  
73 rate of the pathogen and desired level of selectivity leading to underestimation  
74 of bacterial numbers (Ber et al., 2003; Riehm et al., 2011; Sarovich et al.,

75 2010). As of today, culturing remains a gold standard for detection and in  
76 particular quantification.

77

78 The recent development of immunoassay tests for rapid and easy detection in  
79 the form of dipsticks have become preferential, particularly for quick  
80 diagnostics in challenging field conditions in remote locations (Chanteau et  
81 al., 2003; Simon et al., 2013). Yet immunoassays are typically not sensitive  
82 enough to pick up cases of low-level infections or early on in infections where  
83 only small amounts or no antibody is present (Andrianaivoarimanana et al.,  
84 2012; Chanteau et al., 2003; Simon et al., 2013). Other limitations of these  
85 assays are potential false negative results due to the lack of detection of  
86 strains that have genetic deletions of the assays target (such as the F1  
87 capsular antigen) (Anisimov et al., 2004; Eppinger et al., 2010; Perry and  
88 Fetherston, 1997). They are also altogether unsuitable for quantification.

89

90 In the era of sequencing and genomics and the power and relative ease of  
91 PCR based methods, the gold standard of detection is shifting from culture-  
92 based methods towards molecular tools. In this context, PCR based assays  
93 are able to detect the pathogen at low quantities making them the most  
94 appropriate choice for investigative studies where maximal sensitivity is  
95 required. Yet specific detection of bacterial pathogens using PCR or  
96 immunoassay tests must often navigate several major obstacles, many being  
97 the products of bacterial evolution. Most pathogens evolve out of complexes  
98 of related species, where mechanisms like horizontal gene transfer (HGT)  
99 allows a constant exchange of genetic elements, often as plasmids or genetic

100 islands (Juhas, 2015). As a result of these evolutionary trends, specific  
101 detection of the target of interest, as is the case for many pathogenic bacteria  
102 including *Y. pestis* and *Y. pseudotuberculosis*, can be difficult (Achtman et al.,  
103 1999; Easterday et al., 2005; U'Ren et al., 2005). For *Y. pestis*, its recent  
104 evolution from *Y. pseudotuberculosis*, has been accomplished through a  
105 process of functional gene loss and gain through HGT within  
106 *Enterobacteriaceae*. This results in *Y. pestis* being, more or less, a clone of *Y.*  
107 *pseudotuberculosis* with shared elements from other members of  
108 *Enterobacteriaceae* (Achtman et al., 1999; Hinnebusch et al., 2016).

109

110 Historically, discrimination between *Y. pestis* and *Y. pseudotuberculosis* has  
111 been challenging for methods targeting chromosomal sequences, due to the  
112 high degree of genetic similarity between the two species (Califf et al., 2015;  
113 Chain et al., 2004; Gabitzsch et al., 2008; Neubauer et al., 2000). A work-  
114 around has been to use multiple assays to detect specific combinations and  
115 variants of genes located on the chromosome and/or the plasmids of *Y. pestis*  
116 (Stewart et al., 2008; Tomaso et al., 2003). Still, the problems with finding *Y.*  
117 *pestis* specific genes on the main chromosome also extends to plasmid  
118 targets, such as the pCD1 plasmid, a homologue of pYV1 found in *Y.*  
119 *pseudotuberculosis* and *Y. enterocolitica* (Hu et al., 1998; Portnoy et al.,  
120 1984).

121

122 The two most conventional targets for detection of *Y. pestis* both under  
123 laboratory and field conditions are the Capsule antigen fraction 1 (*caf1*) gene  
124 on the pMT1 plasmid and the plasminogen activator gene (*pla*) on the pPCP

125 plasmid. *Pla* is one of the most widely used markers for PCR based detection  
126 of *Y. pestis* in ancient human remains, animals and environmental samples  
127 due to it being present on the pPCP plasmid which is present in multiple  
128 copies in the bacteria and its presumed high specificity for *Y. pestis* (Harbeck  
129 et al., 2013; Stewart et al., 2008; Tomaso et al., 2008). However, recently it  
130 has been established that the gene is present and highly conserved in closely  
131 related bacterial species, and consequently is no longer considered a specific  
132 marker for *Y. pestis* (Armougom et al., 2016; Hänsch et al., 2015). Generally,  
133 a minimum of one other independent molecular marker is required to  
134 positively determine presence of the bacteria; these include genes *caf1* and  
135 Yersinia murine toxin (*ymt*) from the pMT1 plasmid, Low calcium response V  
136 antigen (*lcrV*) from the pCD1 plasmid, pesticin gene on pPCP or  
137 chromosomal targets such as 16S or Inner membrane protein *yihN* (*yihN*)  
138 gene either in separate or multiplex real-time PCR assays (Iqbal et al., 2000;  
139 Stewart et al., 2008; Tomaso et al., 2008; 2003; Woron et al., 2006).  
140 Furthermore plasmids are subject to variation in copy number during certain  
141 conditions, such as during an infection (Wang et al., 2016). Parkhill et al.  
142 showed that *Y. pestis* on average contain about 200 copies of the pPCP1  
143 plasmid (Parkhill et al., 2001), which is partly the reason for the preference of  
144 *pla* as target for detection as the gene is present in high copy number, yet the  
145 variability in copy number is a severe drawback for quantifying *Y. pestis*  
146 concentrations (Stewart et al., 2008; Tomaso et al., 2003).  
147  
148 By combining the established TaqMan® assay with a mismatch amplification  
149 mutation assay (TaqMAMA) (Cha et al., 1992), Glaab and Skopek (Glaab and

150 Skopek, 1999) developed a powerful and rapid method of discriminating  
151 specific single nucleotide alleles in real-time providing a valuable tool for  
152 several fields of science dealing with discrimination between highly similar  
153 targets (Achtman et al., 1999; Chain et al., 2004; Lärkeryd et al., 2014).  
154 TaqMAMA assays have successfully been designed to specifically amplify,  
155 detect and quantify a particular allele when it is paramount to distinguish  
156 between highly similar DNA sequences. Most of these have been developed  
157 in cancer research (Abbaszadegan et al., 2009; Cha et al., 1992), but also for  
158 work in bioforensics or surveillance when positive detection and discrimination  
159 of a pathogen from close genetic neighbors is vital (Achtman, 2008;  
160 Easterday et al., 2005). Previously, Gabitzsch et al. (Gabitzsch et al., 2008)  
161 developed a TaqMan® assay to detect the ferric uptake regulator (*fur*) gene  
162 for the specific quantification of *Y. pestis*, yet has become outmoded as new  
163 sequences have become available showing the gene is highly conserved in  
164 other *Yersinia* and more widely occurs within *Enterobacteriaceae*.  
165 Fortuitously, a 100% *Y. pestis*-specific SNP exists within this gene inward  
166 from the priming site of the reverse primer (*YpfurR*) from the Gabitzsch assay  
167 (Fig. 1). Here we leverage this species-specific SNP to provide a simple and  
168 cheap augmentation to the original assay creating the only single target assay  
169 for *Y. pestis*, which is quantitative, sensitive and rapid as well as, species-  
170 specific.

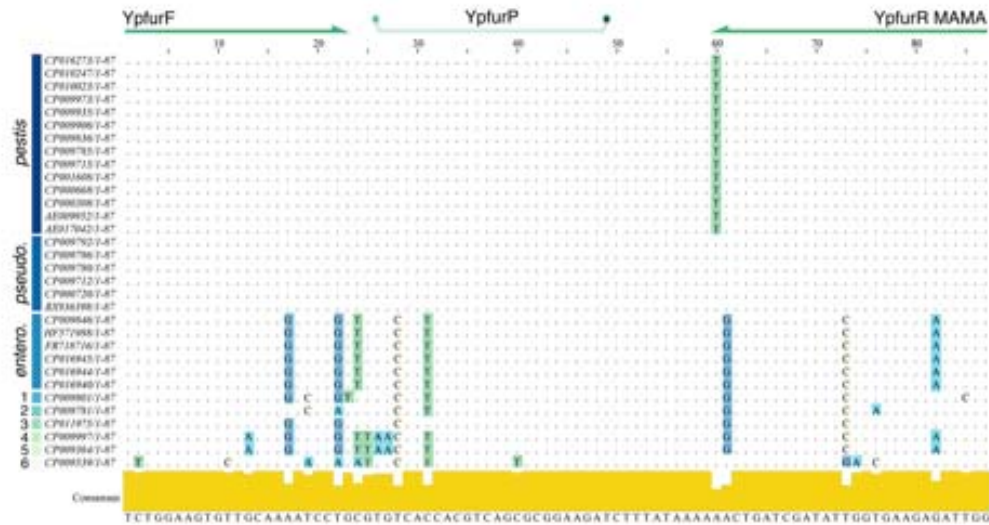

171

172 FIG 1. Nucleotide alignment of the 87 bp PCR fragment, targeted by the assay, of the *fur*  
173 gene of a representative selection of *Yersinia* spp. Only the nucleotide differences between  
174 the strains and the generated consensus is shown. Alignment was generated through an  
175 initial BLAST search in Geneious, names (NCBI accession numbers) and sequences were  
176 subsequently extracted and entered into Jalview where an alignment was automatically  
177 performed to generate the consensus sequence and bar plot. The location of the forward and  
178 reverse primers and the probe are indicated on the top of the alignment. *pestis*: a selection of  
179 *Y. pestis* sequences covering several biovars and geographic locations, *pseudo*.: a selection  
180 of *Y. pseudotuberculosis* sequences, *entero*.: a selection of *Y. enterocolitica* sequences, 1: *Y.*  
181 *intermedia*, 2: *Y. aldovae*, 3: *Y. aleksiciae*, 4: *Y. kristensenii*, 5: *Y. frederiksenii*, 6: *Y. ruckeri*.

182

## 183 Results

### 184 *In silico* screen of SNP, a private allele for *Y. pestis*

185 The ubiquitous presence of the *Y. pestis* allele was confirmed by both  
186 megaBLAST and BLASTn searches (NCBI) of the *fur* gene sequence from  
187 CO92 and the PCR fragment. In both cases the allele was conserved in all  
188 981 published *fur* gene sequences for *Y. pestis* (a global representation),  
189 while the alternate allele was present in all 853 available *fur* gene sequences



190 of *Y. pseudotuberculosis* and all 2950 available *fur* gene sequences of the  
191 other members of the *Yersinia* genus (May 2018, Fig. 1). A BLASTn search of  
192 the *fur* sequence of CO92 against the genome assembly of the strain used in  
193 this study, Az-26 (1102) (not published) confirmed the presence of the *Y.*  
194 *pestis* allele in the *fur* gene of this strain, as well as 100% identity with all  
195 published *Y. pestis*. The SNP, as to date, is a private allele for *Y. pestis*.

196

### 197 **Specificity**

198 The specificity of the *fur*MAMA assay was assessed by analyzing serial 10-  
199 fold dilutions of genomic DNA in quadruplicates from *Y. pestis* and *Y.*  
200 *pseudotuberculosis* alongside the original assay from Gabitzsch et al.  
201 (Gabitzsch et al., 2008). We found no difference in the amplification efficiency  
202 between *Y. pestis* and *Y. pseudotuberculosis* when using the original reverse  
203 primer from the original assay across all DNA concentrations (Fig. 2 (A)). Our  
204 augmented assay successfully quantifies concentrations of *Y. pestis* ranging  
205 from 5 ng (~100 000 000 genome copies) to 50 fg (~10 genome copies) with a  
206 slight shift in amplification efficiency (higher Cq values) compared to when the  
207 original reverse primer is used (Fig. 2 (C)). In contrast, we find amplification  
208 failure in all dilutions of *Y. pseudotuberculosis* and were only able to achieve  
209 false positives using extremely high concentrations of *Y. pseudotuberculosis*  
210 template in the *fur*MAMA assay where we saw some weak cross-reactivity in  
211 three of four replicates at 5 ng and one of the quadruplicates at 500 pg (Fig. 2  
212 (D)). A combined 90 replicates consisting of 64 non-template controls (NTC),  
213 and (assumed) negative tissue and soil samples (from non-endemic areas)  
214 did not show any amplification.

215

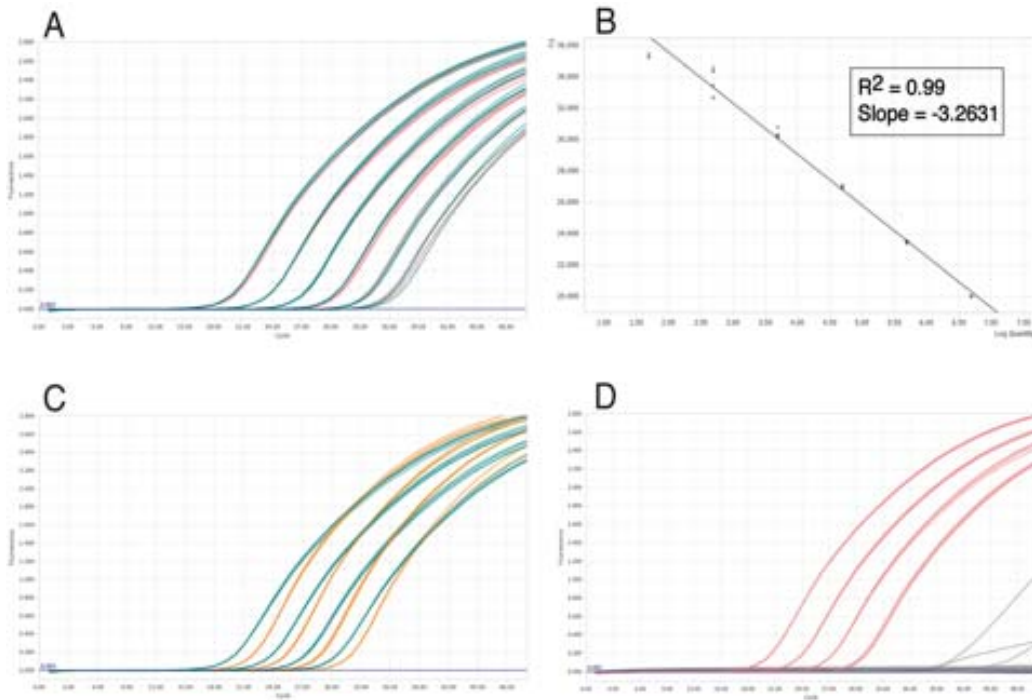

216

217 FIG 2. Real-time plots indicating the amplification efficiency and specificity of the original fur  
218 assay vs the *fur*MAMA TaqMan® mismatch amplification mutation assay (TaqMAMA). (A)  
219 Results of quadruplicate analysis of the 10-fold serial dilutions of *Y. pestis* (blue/teal) and *Y.*  
220 *pseudotuberculosis* (red) DNA (left to right: 5 ng – 50 fg) using the original *fur* assay. (B) The  
221 standard curve plot of *Y. pestis* DNA with the *fur*MAMA assay;  $R^2 = 0.99$ , slope = -3.2631. (C)  
222 Results of quadruplicate analysis of the 10-fold serial dilutions of *Y. pestis* with the original fur  
223 assay (blue/teal) and the *fur*MAMA assay (orange). Only the first four dilutions are shown.  
224 The average Cq values (quadruplicate analysis) in TE buffer were as follows: 5 ng, 17.87;  
225 500 pg, 21.80; 50 pg, 25.33 and 5 pg, 28.64 for the original *fur* assay and 5ng, 19.98; 500 pg,  
226 23.44; 50 pg, 26.96 and 5 pg, 30.36 for the *fur*MAMA assay (curves left to right). (D) Results  
227 of quadruplicate analysis of the 10-fold dilutions of *Y. pseudotuberculosis* with the original *fur*  
228 assay (red) and the *fur*MAMA assay (grey). Only the first four dilutions are shown. The  
229 average Cq values (quadruplicate analysis) in TE buffer were as follows: 5 ng, 18.16; 500 pg,  
230 21.75; 50 pg, 25.23 and 5 pg, 28.96 for the original *fur* assay while the dilutions show overall  
231 amplification failure with the *fur*MAMA assay. For the 5 ng *Y. pseudotuberculosis* with  
232 *fur*MAMA three of the four replicates amplified with the average Cq value of 40.15. For the

233 500 pg only one of the quadruplicates amplified and the Cq value was 43.88. No amplification  
234 was seen for either the 50 pg or 5 pg dilutions.

235

### 236 **Specific quantification and sensitivity of the assay**

237 To evaluate the ability of specific quantification and the sensitivity of the  
238 *furMAMA* assay, 10-fold serial dilutions of *Y. pestis* were analyzed. The assay  
239 successfully amplified *Y. pestis* over a dynamic range of concentrations with a  
240 correlation coefficient ( $R^2$ ) of 0.99 (Fig. 2 (B)) and was able to consistently  
241 quantify as little as 50 fg, which is equivalent to 10 bacterial genomes. The  
242 assay showed sporadic amplification at levels of the 5 fg concentration (3 out  
243 of 33 reactions).

244

### 245 **Detection by conventional PCR**

246 The *furMAMA* assay was also run as a standard PCR without probe to test its  
247 applicability as a detection only assay for when quantification equipment is not  
248 available. The primer pair successfully amplified *Y. pestis* and did not produce  
249 a PCR product of the correct size for any of the quadruplicates of *Y.*  
250 *pseudotuberculosis* (results not shown).

251

### 252 **Screening for inhibition by rodent tissue and soil extracts**

253 In order to assess possible effects of foreign DNA on the *furMAMA* assay we  
254 ran target-spiked controls over a standard dilution range of concentrations  
255 (5ng to 50fg) into DNAs extracted from rodent tissues and soils. *Y. pestis*  
256 DNA was spiked into several types of DNA extracts including ear, tail, liver  
257 and spleen from several rodent species including, great gerbil (*Rhombomys*

258 *opimus*), lab mouse (*Mus musculus*) and bank vole (*Myodes glareolus*) and  
259 DNA from soil from a previous study (Turner et al., 2016). Regardless of  
260 background DNA (tissue or soil) the assay still detects and quantifies across  
261 the range tested without non-specific cross-reactivity. Environmental samples  
262 such as soil extracts can show a high degree of inhibition depending on the  
263 sample and extraction method used (Whitehouse and Hottel, 2007). Our  
264 assay successfully amplified soil extracts spiked with *Y. pestis* although we  
265 did observe an approximately 10-fold reduction in amplification efficiency that  
266 persisted despite the addition of BSA to the reaction.

267

## 268 **Discussion**

269 Although many PCR-based assays exist for *Y. pestis*, none combines species  
270 specificity with accurate quantification. The *fur*MAMA assay is designed to  
271 specifically amplify a fragment of the *fur* gene in *Y. pestis* while preventing  
272 amplification of the gene fragment in other members of the *Yersinia* genus  
273 including its close genetic neighbor *Y. pseudotuberculosis* where the gene  
274 fragment only differs by a single SNP. The SNP in the *fur* gene fragment  
275 targeted by our *fur*MAMA assay is private to, and ubiquitous in all *Y. pestis*.  
276 Specificity is acquired in a single assay through allele-specific amplification of  
277 this SNP in a key virulence gene, *fur*, whose presence is found throughout  
278 *Enterobacteriaceae* without the need for further molecular targets (Fig. 1).  
279 Leveraging a specific SNP within a gene, as done here, is an efficient and  
280 robust method for specific detection of a given bacterial pathogen and can aid  
281 in pathogen detection in metagenomes using next generation sequencing  
282 where close relatives are present in high numbers (Valseth et al., 2017). This

283 circumvents the present issues of specificity when targeting pathogens with  
284 high degree of genetic similarity. A recent large-scale comparative study of *Y.*  
285 *pestis* and *Y. pseudotuberculosis* genomes showed that fewer genes than  
286 previously reported in smaller studies were unique to *Y. pestis* (Califf et al.,  
287 2015). However, both specific combinations, variants of genes and SNPs, the  
288 last example demonstrated here, will be unique to this slowly mutating  
289 pathogen (Cui et al., 2013).

290

291 The original assay published by Gabitzsch et al. (Gabitzsch et al., 2008) was  
292 developed to quantify *Y. pestis* in fleas for their work on flea transmission in a  
293 laboratory experimental setup and not initially aimed at diagnostics or  
294 quantification in field-collected samples. They tested the specificity by running  
295 PCR on reference DNA from 28 species, including *E. coli* and other gram-  
296 negative bacteria, and reported cross-reactivity for 6 *Yersinia* species,  
297 including *Y. enterocolitica*. Surprisingly, they did not report cross-reactivity  
298 with *Y. pseudotuberculosis*. BLAST of the derived *fur* gene fragment from the  
299 Gabitzsch assay resulted in 99% overall homology with *Y. pseudotuberculosis*  
300 sequence and high homology between other *Yersinia* spp. Indeed, we found  
301 the original assay amplifies both *Y. pestis* and *Y. pseudotuberculosis* with  
302 equal efficiency (Fig. 2 (A)). In contrast, the amplification failure of *Y.*  
303 *pseudotuberculosis* with the YpfurR\_MAMA primer establishes our assay's  
304 ability to distinguish between the two highly genetically similar pathogens, as  
305 well as the ability to quantify *Y. pestis* over a broad range of concentrations  
306 (Fig. 2(D and C)). The *Y. pestis* SNP in the *fur* gene is universally present in  
307 all available *Y. pestis* genomes, which limits the probability of false negative

308 results. Conversely, the absence of the mutation in all other *Yersinia* and  
309 *Enterobacteriaceae* reduce the likelihood of false positive results. Our assay  
310 presented false positives and very low-level cross-reactivity at the highest  
311 concentration of *Y. pseudotuberculosis* DNA produced from whole genome  
312 amplification (WGA). The lack of access to a larger collection of *Y.*  
313 *pseudotuberculosis* prohibited us from further testing of cross-reactivity but  
314 based on the specificity testing *in silico* and by targeting a conserved SNP in  
315 the *Y. pestis* genome we are confident this will not be a major problem.

316

## 317 **Conclusions**

318 Our assay provides an alternative to the longstanding culturing method and  
319 the immunoassays by providing a highly sensitive and rapid way of both  
320 specifically detecting and quantifying *Y. pestis* in tissue samples. To our  
321 knowledge, this is the first assay to target a species-specific SNP in a  
322 chromosomal gene of *Y. pestis* with the aim of detecting and quantifying the  
323 amount of the bacteria in tissue samples.

324

## 325 **Materials and Methods**

### 326 **Bacterial strains and DNA extractions**

327 *Y. pestis* strain Az-26 (1102) was isolated from an organ suspension  
328 of *Meriones vinogradovi* in 1969, 1.5 km southeast of Sirab village in the  
329 Nakhchivan Autonomous Republic of Azerbaijan. The culture has been stored  
330 at the Republican Anti-Plague Station laboratory in Baku, Azerbaijan. The  
331 culture became non-viable, yet it was still possible to isolate DNA from the

332 material in 2012 using Qiagen DNeasy® Blood and Tissue kit following  
333 extraction protocol for gram-negative bacteria.  
334 *Y. pseudotuberculosis* Type III strain was donated by Jack C. Leo and Dirk  
335 Linke (University of Oslo). DNA was isolated from broth culture using Qiagen  
336 Blood and Tissue kit following manufacturer's instructions (Qiagen Inc., USA).

337

### 338 **Rodent DNA**

339 No animals were killed for the purpose of this study. We procured samples of  
340 rodent DNA for this study by reaching out to both internal and external  
341 colleagues with existing DNA samples stored. The DNA samples stem from  
342 unpublished work as detailed below.

343 The great gerbil DNA was provided by colleagues in China where the male  
344 individual was captured as part of work carried out in the Junggar Basin of  
345 Xinjiang Province, China (unpublished).

346 The C57BL6 mouse DNA stem from work conducted at the Institute of  
347 Immunology at Oslo University Hospital, Rikshospitalet, Norway  
348 (unpublished). The animal was originally obtained from Janvier labs  
349 ([https://www.janvier-labs.com/rodent-research-models-services/research-](https://www.janvier-labs.com/rodent-research-models-services/research-models/per-species/inbred-mice/product/c57bl6jrx.html)  
350 [models/per-species/inbred-mice/product/c57bl6jrx.html](https://www.janvier-labs.com/rodent-research-models-services/research-models/per-species/inbred-mice/product/c57bl6jrx.html)).

351 The bank vole DNA belongs to the EcoTick-project on tick-/rodent-borne  
352 diseases conducted at the University of Oslo (unpublished).

353

### 354 **Whole genome amplification (WGA) and standard curves**

355 Whole genome amplification was performed on both bacterial strains using  
356 the REPLI-g Mini Kit (Qiagen) following the manufacturer's instructions for

357 subsequent creation of a dynamic range of DNA starting at high  
358 concentrations for standard curves. DNA concentrations after WGA were  
359 determined using the Qubit dsDNA BR Assay kit (molecular probes, Life  
360 Technologies) and the Qubit 2.0 fluorometer. The standard curves were  
361 generated from that starting concentration as serial 10-fold dilutions in TE  
362 buffer in the following concentrations: 5 ng, 500 pg, 50 pg, 5 pg, 500 fg, 50 fg  
363 and 5 fg.

364

### 365 **TaqMAMA Primers and Probe design**

366 Forward primer and probe were identical to oligos designed by Gabitzsch et  
367 al. (Gabitzsch et al., 2008) while the reverse primer was modified to a MAMA  
368 primer to specifically amplify *Y. pestis*. This required the ultimate 3' base to be  
369 complementary to the *Y. pestis* SNP while the penultimate 3' base was  
370 designed to mismatch with the shared sequence between *Y. pestis* and *Y.*  
371 *pseudotuberculosis* (underlined in Table 2). Several reverse MAMA primers  
372 were designed with different nucleotide mismatches at the 3' penultimate  
373 position. These were tested for specificity and amplification efficiency before  
374 ultimately choosing the YpfurR\_MAMA primer.

375

376 **Table 1. List of Primers and probe sequences assayed in qPCR and PCR**  
377 **reactions**

| Primer/Probe | Sequence (5'–3')                   | Product (bp)* |
|--------------|------------------------------------|---------------|
| YpfurF       | TCTGGAAGTGGTGCAAAATCCTG            |               |
| YpfurP       | FAM-TGTCACCACGTCAGCGCGGAAGAT-BAMQ1 |               |
| YpfurR       | AAGCCAATCTCTTCACCAATATCG           | 90            |



|             |                              |    |
|-------------|------------------------------|----|
| YpfurR_MAMA | CCAATCTCTTCACCAATATCGATCAGAA | 87 |
|-------------|------------------------------|----|

378 \* The resulting PCR product size when combining the YpfurF (forward primer) with  
379 the respective reverse primer.

380

### 381 **TaqMAMA PCR protocol**

382 For all experiments, PCR was conducted in 96-well plates (Roche  
383 LightCycler<sup>®</sup> 480 Multiwell Plate 96) using 10- $\mu$ L reactions that contained final  
384 concentrations of 600 nM of both forward and reverse primers, 250 nM probe,  
385 1x Express qPCR Supermix (Invitrogen, by Life Technologies)) and 1  $\mu$ L  
386 template DNA. Real-time PCR was performed on a LightCycler<sup>®</sup> 96  
387 Instrument (Roche) as a two-step PCR with the following conditions: 95 °C for  
388 2 min and 50 cycles of 95 °C for 15 s and 64 °C for 60 s.

389

### 390 **Specificity tests**

391 Given limited access to a large strain collection of *Yersinia*, specificity was  
392 largely assessed using bioinformatics (BLAST) of available sequence data  
393 (see “Bioinformatics” below). Therefore, the specificity and kinetics of the  
394 assay was done through analyzing genomic DNA from a representative of  
395 both alleles (see Fig. 1); *Y. pestis* strain Az-26 (1102) and *Y.*  
396 *pseudotuberculosis* Type III strain running both original reverse primer  
397 (YpfurR) and the modified MAMA primer (YpfurR\_MAMA) in separate, parallel  
398 reactions over a dynamic range of DNA concentrations (5 ng to 5 fg).

399

### 400 **Sensitivity tests**

401 Sensitivity of the furMAMA assay was determined by analyzing serial 10-fold  
402 dilutions of genomic DNA from the *Y. pestis* strain Az-26 (1102) ranging from  
403 5 ng to 5 fg with the lowest dilution being equivalent to one bacterial genome.

404

#### 405 **Testing applicability on tissue and environmental samples**

406 The applicability of the assay on rodent tissue samples was tested by running,  
407 in parallel, DNA extractions of liver and spleen from a great gerbil  
408 (*Rhombomys opimus*), DNA from the tail of a C57BL6 mouse (*Mus musculus*)  
409 and DNA extracted from the ear of a Bank vole (*Myodes glareolus*) with and  
410 without spike-in of *Y. pestis* DNA standard curve. Real-time PCR was  
411 conducted in 96-well plates (Roche LightCycler® 480 Multi-well Plate 96)  
412 using 10-µL reactions that contained final concentrations of 600 nM of both  
413 forward and reverse primer, 250 nM probe, 1x Express qPCR Supermix  
414 (Invitrogen, by Life Technologies)), 1 µL template DNA and for the spiked  
415 samples an additional 1 µL DNA from one of the standard curve  
416 concentrations.

417 The ability of the assay to detect *Y. pestis* despite the inhibitory effects often  
418 seen in environmental samples, was tested by using DNA extractions of soil  
419 samples diluted 1:10. The soil samples were run in parallel with non-  
420 acetylated Bovine Serum Albumin (New England Biolabs) added, with or  
421 without DNA from the *Y. pestis* standard curve in the following manner 1) soil  
422 + BSA, 2) soil + standard curve and 3) soil + standard curve + BSA. Real-time  
423 PCR was conducted as above with the exception that the reactions containing  
424 BSA did so in a final concentration of 1mg/ml.

425

426 **Detection using standard PCR**

427 The primers were also tested with standard PCR to determine their  
428 applicability as a pure detection-based assay. PCR was conducted in 8-well  
429 PCR strips in 10- $\mu$ L reactions that contained a final concentration of 600 nM  
430 both forward and reverse primer, 1x Express qPCR Supermix and 1  $\mu$ L  
431 template DNA. PCR was performed on a MJ Research PTC-200 Peltier  
432 Thermal Cycler Instrument as a two-step PCR with the following conditions:  
433 94 °C for 2 min and 40 cycles of 94 °C for 15 s and 64 °C for 60 s. Successful  
434 amplification was confirmed by running a 3% agarose gel stained with GelRed  
435 (Biotium) at 75 V for 1 hr and 20 min in TAE buffer.

436

437 **Bioinformatics**

438 Specificity of the SNP was assessed across available *Yersinia* and other  
439 related *Enterobacteriaceae* genomes by performing both megaBLAST and  
440 BLASTn searches of the PCR fragment and the whole *fur* gene from *Y. pestis*  
441 CO92 (Accession no. NC\_003143.1, locus\_tag=YPO2634) as query in the  
442 NCBI database using default parameters. BLAST hits were inspected to  
443 confirm which allele was present in the sequence. Finally, the presence of the  
444 *Y. pestis* allele in the strain used in this study (Az-26 (1102)) was confirmed  
445 by a BLASTn search using the *fur* gene from *Y. pestis* CO92 as query against  
446 a BLAST database generated from the Az-26 (1102) genome assembly. From  
447 these data an alignment was made using representative sequences from  
448 BLAST searches through Geneious (<https://www.geneious.com>) and aligned  
449 using Jalview (Waterhouse et al., 2009).

450

451 **Abbreviations**

452 Fur gene: Ferric uptake regulator

453 BSA: Bovine serum albumin

454 Caf1: Capsule antigen fraction 1

455 Cq: Quantification cycle

456 HGT: Horizontal gene transfer

457 IcrV: Low calcium response V antigen

458 Pla: Plasminogen activator

459 SNP: Single nucleotide polymorphism

460 TAE: Tris-acetate-EDTA

461 TaqMAMA: TaqMan® mismatch amplification mutation assay

462 TE: Tris-EDTA

463 WGA: Whole genome amplification

464 yihN: Inner membrane protein yihN

465 Ymt: Yersinia murine toxin

466

467 **Declarations**

468 **Acknowledgements**

469 We would like to thank Jack C. Leo and Dirk Linke at the Department of

470 Biosciences, University of Oslo for providing the *Y. pseudotuberculosis* Type

471 III strain. For the use of the great gerbil DNA, the C57BL6 mouse DNA and

472 the bank vole DNA we would like to thank Ruifu Yang (Beijing Institute of

473 Microbiology and Epidemiology, China) and Yujiang Zhang (Xinjiang CDC,

474 China), Shuo-Wang Qiao (Institute of Immunology at Oslo University Hospital,

475 Rikshospitalet, Norway) and Atle Mysterud (University of Oslo, Norway). We

476 would also like to thank Bradd Haley for bioinformatics support. Lastly, we  
477 would like to thank Monica H. Solbakken and Boris V. Schmid for helpful  
478 comments on the manuscript.

#### 479 **Authors contributions**

480 WRE and PN conceived and planned the experiments and analyzed the data.  
481 PN carried out the experiments and performed bioinformatics. SG procured  
482 and isolated the *Y. pestis* strain Az-26 (1102) for this study. The manuscript  
483 was written with input from all authors. All authors read and approved the final  
484 manuscript.

#### 485 **Availability of data and materials**

486 The *Y. pestis* strain analyzed during this study (Az-26(1102)) is not publicly  
487 available due to said strain being non-viable at isolation. The genome  
488 sequence is available from the corresponding author upon reasonable  
489 request.

#### 490 **Consent for publication**

491 Not applicable.

#### 492 **Competing interests:**

493 The authors declare that they have no competing interests.

#### 494 **Ethics approval and consent to participate**

495 The DNA samples used in this study stems from existing samples stored by  
496 internal and external colleagues and hence the appropriate approvals were  
497 previously obtained as specified below.

498 The use of great gerbil tissue was approved by the Committee for Animal  
499 Welfares of Xinjiang CDC, China.

500 The bank vole was captured as part of EcoTick-project on tick-/rodent-borne  
501 diseases led by Atle Mysterud (University of Oslo) and permission for trapping  
502 rodents were given by the Norwegian Environmental Agency (ref 2013/11201)  
503 and hence conform to the Norwegian laws and regulations.

504 The C57BL6 mouse was used in a project at the Institute of Immunology at  
505 Oslo University Hospital, Rikshospitalet, Norway and is subject to protocol  
506 number 3775 from the Norwegian Food Safety Authority. This agency  
507 evaluates all applications and approvals for ethical handling of animals and  
508 animal experiments in Norway.

#### 509 **Funding:**

510 P. N. is supported by a Molecular Life Sciences (MLS) grant (now Uio: Life  
511 Science) from the University of Oslo as well as through Colloquia 3 at the  
512 Centre for Ecological and Evolutionary Synthesis (CEES) at the University of  
513 Oslo. W. R. E. is supported by Colloquia 3 at CEES at the University of Oslo.  
514 The funding bodies had no role in the design, analysis or interpretation of the  
515 results nor were they involved in writing the manuscript.

516

#### 517 **References**

- 518 Abbaszadegan, M.R., Struewing, J.P., Brown, K.M., Snider, J.V., Goodsaid,  
519 F., Gore-Langton, R., Hughes, M.R., 2009. Automated Detection of  
520 Prevalent Mutations in BRCA1 and BRCA2 Genes, Using a Fluorogenic  
521 PCR Allelic Discrimination Assay. <http://www.liebertpub.com/gte> 1, 171–  
522 180. doi:10.1089/gte.1997.1.171
- 523 Achtman, M., 2008. Evolution, population structure, and phylogeography of  
524 genetically monomorphic bacterial pathogens. *Annu. Rev. Microbiol.* 62,  
525 53–70. doi:10.1146/annurev.micro.62.081307.162832
- 526 Achtman, M., Zurth, K., Morelli, G., Torrea, G., Guiyoule, A., Carniel, E., 1999.  
527 *Yersinia pestis*, the cause of plague, is a recently emerged clone of  
528 *Yersinia pseudotuberculosis*. *Proceedings of the National Academy of*  
529 *Sciences* 96, 14043–14048. doi:10.1073/pnas.96.24.14043
- 530 Andrianaivoarimanana, V., Telfer, S., Rajerison, M., Ranjalahy, M.A.,  
531 Andriamiarimanana, F., Rahaingosoamamitiana, C., Rahalison, L.,

- 532 Jambou, R., 2012. Immune responses to plague infection in wild *Rattus*  
533 *rattus*, in Madagascar: a role in foci persistence? *PLoS ONE* 7, e38630.  
534 doi:10.1371/journal.pone.0038630
- 535 Anisimov, A.P., Lindler, L.E., Pier, G.B., 2004. Intraspecific Diversity of  
536 *Yersinia pestis*. *Clinical Microbiology Reviews* 17, 434–464.  
537 doi:10.1128/CMR.17.2.434-464.2004
- 538 Armougom, F., Bitam, I., Croce, O., Merhej, V., Barassi, L., Nguyen, T.-T., La  
539 Scola, B., Raoult, D., 2016. Genomic Insights into a New *Citrobacter*  
540 *koseri* Strain Revealed Gene Exchanges with the Virulence-Associated  
541 *Yersinia pestis* pPCP1 Plasmid. *Front Microbiol* 7, 340.  
542 doi:10.3389/fmicb.2016.00340
- 543 Ber, R., Mamroud, E., Aftalion, M., Tidhar, A., Gur, D., Flashner, Y., Cohen,  
544 S., 2003. Development of an improved selective agar medium for isolation  
545 of *Yersinia pestis*. *Appl. Environ. Microbiol.* 69, 5787–5792.  
546 doi:10.1128/AEM.69.10.5787-5792.2003
- 547 Bevins, S.N., Baroch, J.A., Nolte, D.L., Zhang, M., He, H., 2012. *Yersinia*  
548 *pestis*: examining wildlife plague surveillance in China and the USA.  
549 *Integrative Zoology* 7, 99–109. doi:10.1111/j.1749-4877.2011.00277.x
- 550 Califf, K.J., Keim, P.S., Wagner, D.M., Sahl, J.W., 2015. Redefining the  
551 differences in gene content between *Yersinia pestis* and *Yersinia*  
552 *pseudotuberculosis* using large-scale comparative genomics. *Microb*  
553 *Genom* 1, e000028. doi:10.1099/mgen.0.000028
- 554 Cha, R.S., Zarbl, H., Keohavong, P., Thilly, W.G., 1992. Mismatch  
555 amplification mutation assay (MAMA): application to the c-H-ras gene.  
556 *PCR Methods Appl.* 2, 14–20.
- 557 Chain, P.S.G., Carniel, E., Larimer, F.W., Lamerdin, J., Stoutland, P.O.,  
558 Regala, W.M., Georgescu, A.M., Vergez, L.M., Land, M.L., Motin, V.L.,  
559 Brubaker, R.R., Fowler, J., Hinnebusch, J., Marceau, M., Medigue, C.,  
560 Simonet, M., Chenal-Francois, V., Souza, B., Dacheux, D., Elliott, J.M.,  
561 Derbise, A., Hauser, L.J., Garcia, E., 2004. Insights into the evolution of  
562 *Yersinia pestis* through whole-genome comparison with *Yersinia*  
563 *pseudotuberculosis*. *Proceedings of the National Academy of Sciences*  
564 101, 13826–13831. doi:10.1073/pnas.0404012101
- 565 Chanteau, S., Rahalison, L., Ralafiarisoa, L., Foulon, J., Ratsitorahina, M.,  
566 Ratsifasoamanana, L., Carniel, E., Nato, F., 2003. Development and  
567 testing of a rapid diagnostic test for bubonic and pneumonic plague. *The*  
568 *Lancet* 361, 211–216. doi:10.1016/S0140-6736(03)12270-2
- 569 Cui, Y., Yu, C., Yan, Y., Li, D., Li, Y., Jombart, T., Weinert, L.A., Wang, Z.,  
570 Guo, Z., Xu, L., Zhang, Y., Zheng, H., Qin, N., Xiao, X., Wu, M., Wang, X.,  
571 Zhou, D., Qi, Z., Du, Z., Wu, H., Yang, X., Cao, H., Wang, H., Wang, J.,  
572 Yao, S., Rakin, A., Li, Y., Falush, D., Balloux, F., Achtman, M., Song, Y.,  
573 Wang, J., Yang, R., 2013. Historical variations in mutation rate in an  
574 epidemic pathogen, *Yersinia pestis*. *Proceedings of the National Academy*  
575 *of Sciences* 110, 577–582. doi:10.1073/pnas.1205750110
- 576 Dennis, D.T., Gage, K.L., Gratz, N.G., Poland, J.D., Tikhomirov, E., 1999.  
577 *Plague manual: epidemiology, distribution, surveillance and control.* World  
578 Health Organisation, Geneva, Switzerland.
- 579 Easterday, W.R., Van Ert, M.N., Zanecki, S., Keim, P., 2005. Specific  
580 detection of *Bacillus anthracis* using a TaqMan mismatch amplification  
581 mutation assay. *Biotechniques*.

- 582 Eppinger, M., Worsham, P.L., Nikolich, M.P., Riley, D.R., Sebastian, Y., Mou,  
583 S., Achtman, M., Lindler, L.E., Ravel, J., 2010. Genome sequence of the  
584 deep-rooted *Yersinia pestis* strain Angola reveals new insights into the  
585 evolution and pangenome of the plague bacterium. *Journal of*  
586 *Bacteriology* 192, 1685–1699. doi:10.1128/JB.01518-09
- 587 Gabitzsch, E.S., Vera-Tudela, R., Eisen, R.J., Bearden, S.W., Gage, K.L.,  
588 Zeidner, N.S., 2008. Development of a real-time quantitative PCR assay  
589 to enumerate *Yersinia pestis* in fleas. *Am J Trop Med Hyg* 79, 99–101.
- 590 Glaab, W.E., Skopek, T.R., 1999. A novel assay for allelic discrimination that  
591 combines the fluorogenic 5' nuclease polymerase chain reaction  
592 (TaqMan®) and mismatch amplification mutation assay. *Mutation*  
593 *Research/Fundamental and Molecular Mechanisms of Mutagenesis* 430,  
594 1–12. doi:10.1016/S0027-5107(99)00147-5
- 595 Gupta, V., Gulati, P., Bhagat, N., Dhar, M.S., Viridi, J.S., 2015. Detection of  
596 *Yersinia enterocolitica* in food: an overview. *Eur. J. Clin. Microbiol. Infect.*  
597 *Dis.* 34, 641–650. doi:10.1007/s10096-014-2276-7
- 598 Harbeck, M., Seifert, L., Hänsch, S., Wagner, D.M., Birdsell, D., Parise, K.L.,  
599 Wiechmann, I., Grupe, G., Thomas, A., Keim, P., Zöller, L., Bramanti, B.,  
600 Riehm, J.M., Scholz, H.C., 2013. *Yersinia pestis* DNA from Skeletal  
601 Remains from the 6 th Century AD Reveals Insights into Justinianic  
602 Plague. *PLoS Pathog.* 9, e1003349. doi:10.1371/journal.ppat.1003349
- 603 Hänsch, S., Cilli, E., Catalano, G., Gruppioni, G., Bianucci, R., Stenseth, N.C.,  
604 Bramanti, B., Pallen, M.J., 2015. The *pla* gene, encoding plasminogen  
605 activator, is not specific to *Yersinia pestis*. *BMC Research Notes* 2015 8:1  
606 8, 535. doi:10.1186/s13104-015-1525-x
- 607 Hinnebusch, B.J., Chouikha, I., Sun, Y.-C., 2016. Ecological Opportunity,  
608 Evolution, and the Emergence of Flea-Borne Plague. *Infection and*  
609 *Immunity* 84, 1932–1940. doi:10.1128/IAI.00188-16
- 610 Hu, P., Elliott, J., McCready, P., Skowronski, E., Garnes, J., Kobayashi, A.,  
611 Brubaker, R.R., Garcia, E., 1998. Structural organization of virulence-  
612 associated plasmids of *Yersinia pestis*. *Journal of Bacteriology* 180, 5192–  
613 5202.
- 614 Iqbal, S.S., Chambers, J.P., Goode, M.T., Valdes, J.J., Brubaker, R.R., 2000.  
615 Detection of *Yersinia pestis* by pesticin fluorogenic probe-coupled PCR.  
616 *Molecular and Cellular Probes* 14, 109–114. doi:10.1006/mcpr.2000.0295
- 617 Juhas, M., 2015. Horizontal gene transfer in human pathogens. *Crit. Rev.*  
618 *Microbiol.* 41, 101–108. doi:10.3109/1040841X.2013.804031
- 619 Lärkeryd, A., Myrtenäs, K., Karlsson, E., Dwibedi, C.K., Forsman, M.,  
620 Larsson, P., Johansson, A., Sjödin, A., 2014. CanSNPer: a hierarchical  
621 genotype classifier of clonal pathogens. *Bioinformatics* 30, 1762–1764.  
622 doi:10.1093/bioinformatics/btu113
- 623 Melikishvili, A., 2006. Genesis of the anti-plague system: the Tsarist period.  
624 *Crit. Rev. Microbiol.* 32, 19–31. doi:10.1080/10408410500496763
- 625 Neubauer, H., Meyer, H., Prior, J., Aleksic, S., Hensel, A., Splettstösser, W.,  
626 2000. A combination of different polymerase chain reaction (PCR) assays  
627 for the presumptive identification of *Yersinia pestis*. *J. Vet. Med. B Infect.*  
628 *Dis. Vet. Public Health* 47, 573–580.
- 629 Parkhill, J., Wren, B.W., Thomson, N.R., Titball, R.W., Holden, M.T.G.,  
630 Prentice, M.B., Sebahia, M., James, K.D., Churcher, C., Mungall, K.L.,  
631 Baker, S., Basham, D., Bentley, S.D., Brooks, K., Cerdeño-Tárraga, A.M.,



- 632 Chillingworth, T., Cronin, A., Davies, R.M., Davis, P., Dougan, G., Feltwell,  
633 T., Hamlin, N., Holroyd, S., Jagels, K., Karlyshev, A.V., Leather, S.,  
634 Moule, S., Oyston, P.C.F., Quail, M., Rutherford, K., Simmonds, M.,  
635 Skelton, J., Stevens, K., Whitehead, S., Barrell, B.G., 2001. Genome  
636 sequence of *Yersinia pestis*, the causative agent of plague. *Nature* 413,  
637 523–527. doi:10.1038/35097083
- 638 Perry, R.D., Fetherston, J.D., 1997. *Yersinia pestis* - Etiologic agent of plague.  
639 *Clinical Microbiology Reviews* 10, 35–66.
- 640 Portnoy, D.A., Wolf-Watz, H., Bolin, I., Beeder, A.B., Falkow, S., 1984.  
641 Characterization of common virulence plasmids in *Yersinia* species and  
642 their role in the expression of outer membrane proteins. *Infection and*  
643 *Immunity* 43, 108–114.
- 644 Riehm, J.M., Rahalison, L., Scholz, H.C., Thoma, B., Pfeffer, M., Razanakoto,  
645 L.M., Dahouk, Al, S., Neubauer, H., Tomaso, H., 2011. Detection of  
646 *Yersinia pestis* using real-time PCR in patients with suspected  
647 bubonic plague. *Molecular and Cellular Probes* 25, 8–12.  
648 doi:10.1016/j.mcp.2010.09.002
- 649 Sarovich, D.S., Colman, R.E., Price, E.P., Chung, W.K., Lee, J., Schupp,  
650 J.M., Cobble, K.R., Busch, J.D., Alexander, J., Keim, P., Wagner, D.M.,  
651 2010. Selective isolation of *Yersinia pestis* from plague-infected fleas. *J.*  
652 *Microbiol. Methods* 82, 95–97. doi:10.1016/j.mimet.2010.03.019
- 653 Simon, S., Demeure, C., Lamourette, P., Filali, S., Plaisance, M., Créminon,  
654 C., Volland, H., Carniel, E., 2013. Fast and simple detection of *Yersinia*  
655 *pestis* applicable to field investigation of plague foci. *PLoS ONE* 8,  
656 e54947. doi:10.1371/journal.pone.0054947
- 657 Stewart, A., Satterfield, B., Cohen, M., O'Neill, K., Robison, R., 2008. A  
658 quadruplex real-time PCR assay for the detection of *Yersinia pestis* and  
659 its plasmids. *Journal of Medical Microbiology* 57, 324–331.  
660 doi:10.1099/jmm.0.47485-0
- 661 Tomaso, H., Jacob, D., Eickhoff, M., Scholz, H.C., Dahouk, Al, S., Kattar,  
662 M.M., Reischl, U., Plicka, H., Olsen, J.S., Nikkari, S., Matero, P., Beuret,  
663 C., Ciammaruconi, A., Lista, F., Gala, J.-L., Broll, H., Appel, B., Sellek  
664 Cano, R.E., del Carmen Ybarra de Villavicencio, M., Broekhuijsen, M.,  
665 Indra, A., Petersen, R., Neubauer, H., 2008. Preliminary validation of real-  
666 time PCR assays for the identification of *Yersinia pestis*. *Clin. Chem. Lab.*  
667 *Med.* 46, 1239–1244. doi:10.1515/CCLM.2008.251
- 668 Tomaso, H., Reisinger, E.C., Dahouk, S., Frangoulidis, D., Rakin, A., Landt,  
669 O., Neubauer, H., 2003. Rapid detection of *Yersinia pestis* with multiplex  
670 real-time PCR assays using fluorescent hybridisation probes. *Pathogens*  
671 *and Disease* 38, 117–126. doi:10.1016/S0928-8244(03)00184-6
- 672 Turner, W.C., Kausrud, K.L., Beyer, W., Easterday, W.R., Barandongo, Z.R.,  
673 Blaschke, E., Cloete, C.C., Lazak, J., Van Ert, M.N., Ganz, H.H., Turnbull,  
674 P.C.B., Stenseth, N.C., Getz, W.M., 2016. Lethal exposure: An integrated  
675 approach to pathogen transmission via environmental reservoirs. *Sci Rep*  
676 6, 27311. doi:10.1038/srep27311
- 677 U'Ren, J.M., Van Ert, M.N., Schupp, J.M., Easterday, W.R., Simonson, T.S.,  
678 Okinaka, R.T., Pearson, T., Keim, P., 2005. Use of a real-time PCR  
679 TaqMan assay for rapid identification and differentiation of *Burkholderia*  
680 *pseudomallei* and *Burkholderia mallei*. *Journal of Clinical Microbiology* 43,  
681 5771–5774. doi:10.1128/JCM.43.11.5771-5774.2005

- 682 Valseth, K., Nesbø, C.L., Easterday, W.R., Turner, W.C., Olsen, J.S.,  
683 Stenseth, N.C., Haverkamp, T.H.A., 2017. Temporal dynamics in  
684 microbial soil communities at anthrax carcass sites. *BMC Microbiology*  
685 2008 8:1 17, 206. doi:10.1186/s12866-017-1111-6
- 686 Wang, H., Avican, K., Fahlgren, A., Erttmann, S.F., Nuss, A.M., Dersch, P.,  
687 Fallman, M., Edgren, T., Wolf-Watz, H., 2016. Increased plasmid copy  
688 number is essential for *Yersinia T3SS* function and virulence. *Science*  
689 353, 492–495. doi:10.1126/science.aaf7501
- 690 Waterhouse, A.M., Procter, J.B., Martin, D.M.A., Clamp, M., Barton, G.J.,  
691 2009. Jalview Version 2--a multiple sequence alignment editor and  
692 analysis workbench. *Bioinformatics* 25, 1189–1191.  
693 doi:10.1093/bioinformatics/btp033
- 694 Whitehouse, C.A., Hottel, H.E., 2007. Comparison of five commercial DNA  
695 extraction kits for the recovery of *Francisella tularensis* DNA from spiked  
696 soil samples. *Molecular and Cellular Probes* 21, 92–96.  
697 doi:10.1016/j.mcp.2006.08.003
- 698 World Health Organization, 2017. Plague [WWW Document].  
699 <http://www.who.int/news-room/fact-sheets/detail/plague>. URL  
700 <http://www.who.int/news-room/fact-sheets/detail/plague> (accessed  
701 5.29.18).
- 702 Woron, A.M., Nazarian, E.J., Egan, C., McDonough, K.A., Cirino, N.M.,  
703 Limberger, R.J., Musser, K.A., 2006. Development and evaluation of a 4-  
704 target multiplex real-time polymerase chain reaction assay for the  
705 detection and characterization of *Yersinia pestis*. *Diagn. Microbiol. Infect.*  
706 *Dis.* 56, 261–268. doi:10.1016/j.diagmicrobio.2006.06.009  
707
